# Supplementary material
Source: publisher figshare collection journal article supplement (https://tandf.figshare.com/articles/dataset/_/11532972)
Supplement: Supplementary file 1 [file 1]

**Supplementary Table S1.**

Analysis of the *who*, *why* and *how* of the included intervention studies.

| Author and year            | Intervention                                    | Who                                                                                                                                                                | Why                                                                                                                                                     | How                                                                                                                                                                                                                         |                                                                                                                                                |                                           |                                  |                        |                                                      |
|----------------------------|-------------------------------------------------|--------------------------------------------------------------------------------------------------------------------------------------------------------------------|---------------------------------------------------------------------------------------------------------------------------------------------------------|-----------------------------------------------------------------------------------------------------------------------------------------------------------------------------------------------------------------------------|------------------------------------------------------------------------------------------------------------------------------------------------|-------------------------------------------|----------------------------------|------------------------|------------------------------------------------------|
|                            |                                                 | Target group                                                                                                                                                       | Aim of person-centred rehabilitation                                                                                                                    | Ethical principles, existential support and supporting personhood                                                                                                                                                           | Professional tools and methods                                                                                                                 | Holistic assessment                       | Activate and empower the patient | Building relationships | Organization and structure                           |
| Amieva et al., 2016 [31]   | Individualized cognitive rehabilitation therapy | Dementia and his/her caregiver.<br><br>The caregivers received weekly telephone contact during which he/she could discuss particular difficulties or ask questions | The psychologist had to adapt the program according to participants' cognitive abilities in order to anticipate and avoid as much as possible failures. | Sessions (individual) dedicated to select meaningful activities.<br><br>The psychologist had to adapt the program according to patients' cognitive abilities in order to anticipate and avoid as much as possible failures. | The activities (activities of daily living or leisure activities) to be trained selected according to goals of personal relevance to patients. |                                           |                                  |                        |                                                      |
| Brueggen et al., 2017 [21] | Cognitive rehabilitation - an integrative       | To monitor activities at home,                                                                                                                                     |                                                                                                                                                         | The order of the modules varied flexibly                                                                                                                                                                                    |                                                                                                                                                | Identification of problems and definition |                                  |                        | The order of the modules varied flexibly in response |

|                    |                                   |                                              |                             |                                                                                                                                                                                                                                                                                                                                                                                         |  |                                                                                                                                                                                   |  |  |                                                                                                                                                                                                                                                                                                                               |
|--------------------|-----------------------------------|----------------------------------------------|-----------------------------|-----------------------------------------------------------------------------------------------------------------------------------------------------------------------------------------------------------------------------------------------------------------------------------------------------------------------------------------------------------------------------------------|--|-----------------------------------------------------------------------------------------------------------------------------------------------------------------------------------|--|--|-------------------------------------------------------------------------------------------------------------------------------------------------------------------------------------------------------------------------------------------------------------------------------------------------------------------------------|
|                    | multimodal intervention (CORDIAL) | caregivers were called by phone once a week. |                             | <p>in response to the participants' needs.</p> <p>Sessions were extended from a one-hour session per week to one two-hour session per week, allowing sufficient time to address individual needs despite the group setting.</p> <p>Organization and implementation of pleasurable and meaningful activities.</p> <p>Evaluation of achieved goals and planning of future procedures.</p> |  | <p>of treatment goals. This included determining obstacles to independent living e.g., the inability to utilize cooking devices, and aspects that reduce the quality of life.</p> |  |  | <p>to the participants' needs.</p> <p>Sessions were extended from a one-hour session per week to one two-hour session per week, allowing sufficient time to address individual needs despite the group setting.</p> <p>The complexity of the worksheets was reduced according to the cognitive state of the participants.</p> |
| Brunelle-Hamann et | Cognitive rehabilitation          | When a caregiver                             | The level of assistance was |                                                                                                                                                                                                                                                                                                                                                                                         |  |                                                                                                                                                                                   |  |  | Home setting either in the community or                                                                                                                                                                                                                                                                                       |

|                        |                                                  |                                                                                                                                                                                                                              |                                                                                                                                        |                                                                                                                                                                                                                  |                                                                                                                                                                                      |  |  |  |                                                                                                                                                                                                                                                       |
|------------------------|--------------------------------------------------|------------------------------------------------------------------------------------------------------------------------------------------------------------------------------------------------------------------------------|----------------------------------------------------------------------------------------------------------------------------------------|------------------------------------------------------------------------------------------------------------------------------------------------------------------------------------------------------------------|--------------------------------------------------------------------------------------------------------------------------------------------------------------------------------------|--|--|--|-------------------------------------------------------------------------------------------------------------------------------------------------------------------------------------------------------------------------------------------------------|
| al., 2014 [27]         |                                                  | agreed to participate as an informant, he/she had to be available and sufficiently involved in the patient's care to provide reliable information about the patient's history, symptoms and his/her own burden and distress. | provided according to the performance of each participant, in order to limit potential mistakes (per the errorless learning paradigm). |                                                                                                                                                                                                                  |                                                                                                                                                                                      |  |  |  | in homes for the elderly.                                                                                                                                                                                                                             |
| Chew et al., 2015 [30] | Multimodal cognitive and physical rehabilitation | Patient and caregiver. Caregivers as informants on caregiver burden.                                                                                                                                                         |                                                                                                                                        | Based on individual goal-setting. Identified problems were translated into goals, without restriction on the types of goals that can be set.<br><br>Tailored individualized activities delivering person-centred | Goal attainment scaling was a tool for measuring treatment effects relevant to the individual, defining individual treatment goals at the outset and monitoring for goal attainment. |  |  |  | Group therapy sessions.<br><br>Regular feedback on progress was provided to the participant and his/her caregiver in the form of a progress card during the program, with advice to continue the learned activities at home between therapy sessions. |

|                                          |                                                       |                                                                                                                                                                                         |  |                                                                                                                                                                                                                                                                                           |                                                                                                                                                                                                                                          |  |                                                                                                                                                                                                                                                            |                                                                                                                                                                                                                                                                                                                                                 |                                                                               |
|------------------------------------------|-------------------------------------------------------|-----------------------------------------------------------------------------------------------------------------------------------------------------------------------------------------|--|-------------------------------------------------------------------------------------------------------------------------------------------------------------------------------------------------------------------------------------------------------------------------------------------|------------------------------------------------------------------------------------------------------------------------------------------------------------------------------------------------------------------------------------------|--|------------------------------------------------------------------------------------------------------------------------------------------------------------------------------------------------------------------------------------------------------------|-------------------------------------------------------------------------------------------------------------------------------------------------------------------------------------------------------------------------------------------------------------------------------------------------------------------------------------------------|-------------------------------------------------------------------------------|
|                                          |                                                       |                                                                                                                                                                                         |  | care.                                                                                                                                                                                                                                                                                     |                                                                                                                                                                                                                                          |  |                                                                                                                                                                                                                                                            |                                                                                                                                                                                                                                                                                                                                                 |                                                                               |
| Clare et al.,<br>2010 [22]               | Cognitive<br>rehabilitation                           | People with<br>dementia<br><br>Carers, where<br>available, were<br>invited to join<br>the last 15<br>minutes of<br>each session to<br>support<br>between-<br>session<br>implementation. |  | Individualized<br>intervention<br>addressing<br>personally<br>meaningful<br>goals.                                                                                                                                                                                                        | The Canadian<br>Occupational<br>Performance<br>Measure was<br>used to enable<br>all participants<br>to identify up<br>to five<br>personally<br>relevant goals<br>in areas<br>relating to self-<br>care, leisure,<br>and<br>productivity. |  | Participants were<br>encouraged to<br>work on goals, and<br>practice<br>strategies,<br>between sessions.                                                                                                                                                   |                                                                                                                                                                                                                                                                                                                                                 | Assessments and<br>interventions were<br>conducted in<br>participants' homes. |
| Fernandez-<br>Calvo et al.,<br>2015 [23] | Multicomponent<br>cognitive<br>stimulation<br>program | Patients and<br>informal<br>caregivers were<br>involved in the<br>training at<br>home.                                                                                                  |  | These activities<br>(cognitive tasks,<br>daily problem-<br>solving<br>strategies,<br>learning or re-<br>learning<br>information, or<br>compensatory<br>strategies)<br>were<br>implemented in<br>partnership<br>with patients,<br>taking into<br>account their<br>needs and<br>motivation. |                                                                                                                                                                                                                                          |  | The activities<br>were<br>implemented in<br>partnership<br>with patients.<br><br>The therapists<br>provided<br>encouragement<br>as a form of<br>positive<br>reinforcement<br>during the<br>session,<br>focusing on<br>positive<br>outcome and<br>feelings. | Implemented in the<br>patients' homes by<br>occupational<br>therapists.<br><br>The difficulty of the<br>tasks used in the<br>sessions were<br>progressively<br>increased from an<br>easier level to<br>maintain a<br>perception of control<br>over performance<br>while ensuring the<br>tasks eventually<br>became sufficiently<br>challenging. |                                                                               |

|                          |                                                                       |         |  |                                                                                                                                                                                                                                                           |                                                                                                                                                                                                                                                                |  |  |  |  |
|--------------------------|-----------------------------------------------------------------------|---------|--|-----------------------------------------------------------------------------------------------------------------------------------------------------------------------------------------------------------------------------------------------------------|----------------------------------------------------------------------------------------------------------------------------------------------------------------------------------------------------------------------------------------------------------------|--|--|--|--|
| Kim et al.,<br>2015 [33] | Cognitive<br>rehabilitation                                           | Patient |  | An<br>individualized<br>intervention<br>focusing on a<br>personally<br>meaningful goal                                                                                                                                                                    | The individual<br>sessions for the<br>Cognitive<br>rehabilitation<br>approach<br>involved an<br>individualized<br>intervention<br>focusing on a<br>personally<br>meaningful<br>goal indicated<br>by The<br>Canadian<br>Occupational<br>Performance<br>Measure. |  |  |  |  |
| Lee et al.,<br>2013 [57] | Computer<br>errorless<br>learning-based<br>memory training<br>program |         |  | The level of<br>difficulty of<br>questions was<br>set appropriate<br>to the level of<br>cognitive<br>function of the<br>subjects.<br><br>The programs<br>were designed<br>using a<br>culturally<br>relevant<br>training<br>program with<br>familiar daily |                                                                                                                                                                                                                                                                |  |  |  |  |

|                             |                                      |                                                                                                                                                                              |  |                                                                                                                                                                                                                                    |  |  |                                                                                                                                                                                                            |  |                                                                                                                                                                                                                                                                                                                                               |
|-----------------------------|--------------------------------------|------------------------------------------------------------------------------------------------------------------------------------------------------------------------------|--|------------------------------------------------------------------------------------------------------------------------------------------------------------------------------------------------------------------------------------|--|--|------------------------------------------------------------------------------------------------------------------------------------------------------------------------------------------------------------|--|-----------------------------------------------------------------------------------------------------------------------------------------------------------------------------------------------------------------------------------------------------------------------------------------------------------------------------------------------|
|                             |                                      |                                                                                                                                                                              |  | life training content, and gradation of training was based on the level of functioning, habits, and interests of older Chinese adults with early Alzheimer's disease.                                                              |  |  |                                                                                                                                                                                                            |  |                                                                                                                                                                                                                                                                                                                                               |
| Laakkonen et al., 2016 [28] | Self-management group rehabilitation | <p>Couples were advised to do homework together between sessions.</p> <p>Offered people with dementia and their spouses possibilities for shared information and support</p> |  | <p>All activities and discussions were adjusted according to participant preferences.</p> <p>Participants were able to invite experts to group sessions.</p> <p>To provide positive prospects and goal-setting for the future.</p> |  |  | <p>Empowerment, self-efficacy and mastery over one's own life with better ability to manage living with dementia.</p> <p>Participants were encouraged to give anonymous feedback on their experiences.</p> |  | <p>Group facilitators visited couples' homes before the first session and encouraged them to express their preferences for topics in the group sessions.</p> <p>Principles guiding the group facilitators were respecting participant autonomy, enhancing their empowerment, use of own resources, problem-solving skills, and mastery of</p> |

|                           |                                                      |                                     |  |                                                                                                                                                                                                                      |                                                                                                                                                                                                            |                                                                                                                                              |                                                                                                                                                                                                                    |  |                                                                                                                                                                                                        |
|---------------------------|------------------------------------------------------|-------------------------------------|--|----------------------------------------------------------------------------------------------------------------------------------------------------------------------------------------------------------------------|------------------------------------------------------------------------------------------------------------------------------------------------------------------------------------------------------------|----------------------------------------------------------------------------------------------------------------------------------------------|--------------------------------------------------------------------------------------------------------------------------------------------------------------------------------------------------------------------|--|--------------------------------------------------------------------------------------------------------------------------------------------------------------------------------------------------------|
|                           |                                                      |                                     |  |                                                                                                                                                                                                                      |                                                                                                                                                                                                            |                                                                                                                                              |                                                                                                                                                                                                                    |  | everyday life.                                                                                                                                                                                         |
| Ochmann et al., 2017 [37] | Cognitive rehabilitation                             |                                     |  | Identifying individual problems, defining personal goals, biographical work, implementation of pleasant activities and external memory aids, concluded by an evaluation session with individual plans for the future |                                                                                                                                                                                                            | Identifying individual problems, defining personal goals, biographical work, implementation of pleasant activities and external memory aids. |                                                                                                                                                                                                                    |  |                                                                                                                                                                                                        |
| Regan et al., 2017 [29]   | Individualized face-to-face cognitive rehabilitation | Delivered to client–supporter dyads |  | The focus of strategies was on positive resources, intact functions, retained skills, and activities clients could still take part in<br><br>Individualized intervention addressing personally                       | The Canadian Occupational Performance Measure was used to assist clients to identify up to five personally relevant goals in areas relating to self-care, leisure, and productivity.<br><br>Questionnaires |                                                                                                                                              | Clients were encouraged to practice techniques with assistance from their supporter between sessions.<br><br>Clients and supporters were encouraged to help brainstorm and select the most appropriate strategies. |  | All sessions were conducted in participants' homes.<br><br>Although the basic structure of sessions was prescribed in a manual, their content could be adapted flexibly to meet specific client goals. |

|                              |                                                                                                                                                                                    |                                               |                                                                                                                  |                                                                                                                                                                                          |                                                                                               |  |                                                                                                                                                                                                                                                  |  |                                                                                                                      |
|------------------------------|------------------------------------------------------------------------------------------------------------------------------------------------------------------------------------|-----------------------------------------------|------------------------------------------------------------------------------------------------------------------|------------------------------------------------------------------------------------------------------------------------------------------------------------------------------------------|-----------------------------------------------------------------------------------------------|--|--------------------------------------------------------------------------------------------------------------------------------------------------------------------------------------------------------------------------------------------------|--|----------------------------------------------------------------------------------------------------------------------|
|                              |                                                                                                                                                                                    |                                               |                                                                                                                  | meaningful goals.                                                                                                                                                                        | assessing mood, illness adjustment, quality of life, and carer burden were also administered. |  |                                                                                                                                                                                                                                                  |  |                                                                                                                      |
| Schiffczyk et al., 2013 [24] | Short-Term inpatient rehabilitation                                                                                                                                                | Patient and caregiver.                        |                                                                                                                  | Tailored to the individual needs                                                                                                                                                         |                                                                                               |  |                                                                                                                                                                                                                                                  |  | The study was conducted in the families' households to identify the impact of disease in their familiar environment. |
| Tanaka et al., 2017 [32]     | The five principles of brain-activating rehabilitation were categorized as cognitive rehabilitation and involved reminiscence therapy, reality orientation, and physical activity. | Patients in a group setting and individually. | The primary expected effect was that participants will regain a desire for living as well as their self-respect. | Enjoyable and comfortable activities in an accepting atmosphere.<br><br>The primary expected effect was that participants will regain a desire for living as well as their self-respect. |                                                                                               |  | Through this process, participants were expected to regain their self-confidence and to take on the social function of passing on knowledge to younger generations. When the participants did so, the intervention staff praised them naturally. |  |                                                                                                                      |
| Tay et al.,                  | MINDVital                                                                                                                                                                          | Accompanied by                                |                                                                                                                  | All participants                                                                                                                                                                         |                                                                                               |  | Regular feedback                                                                                                                                                                                                                                 |  | To ensure each                                                                                                       |



|                             |                          |                        |  |                                                                                                                                                                                    |                                                                                                                                                                                                                                                            |  |                                                                                                                                                                                                             |  |                                                                                             |
|-----------------------------|--------------------------|------------------------|--|------------------------------------------------------------------------------------------------------------------------------------------------------------------------------------|------------------------------------------------------------------------------------------------------------------------------------------------------------------------------------------------------------------------------------------------------------|--|-------------------------------------------------------------------------------------------------------------------------------------------------------------------------------------------------------------|--|---------------------------------------------------------------------------------------------|
| 2016 [25]                   | rehabilitation           | a reliable caregiver.  |  | and their caregivers attended a brief interview at the beginning of the program to define their individual treatment goals.                                                        |                                                                                                                                                                                                                                                            |  | on participant's progress was provided to the participant and caregiver in the form of a progress card during the program, with advice to continue the learned activities at home between therapy sessions. |  | participant receives individualized attention, group sizes were limited to 10 participants. |
| Thivierge et al., 2014 [26] | Cognitive rehabilitation | Patient and caregiver. |  | The instrumental activities of daily living to be trained was chosen in collaboration with the patient and his/her caregiver in order to target the patient's needs and interests. | The performance on the instrumental activities of daily living to be trained was assessed by a Direct Measure of Training (DMT), an observational instrument adapted from the well validated activities of daily living. Situational Test. <sup>31</sup> . |  |                                                                                                                                                                                                             |  | All evaluation and training sessions were carried out at the patient's home.                |
| Toba et al.,                | Intensive                |                        |  |                                                                                                                                                                                    | First, the                                                                                                                                                                                                                                                 |  |                                                                                                                                                                                                             |  |                                                                                             |

|                            |                                 |  |  |                                                                                                                                                   |                                                                                                                                                                                                                                                                               |  |                                                                                                                                                                        |                                                                                                                                             |  |
|----------------------------|---------------------------------|--|--|---------------------------------------------------------------------------------------------------------------------------------------------------|-------------------------------------------------------------------------------------------------------------------------------------------------------------------------------------------------------------------------------------------------------------------------------|--|------------------------------------------------------------------------------------------------------------------------------------------------------------------------|---------------------------------------------------------------------------------------------------------------------------------------------|--|
| 2014 [38]                  | rehabilitation                  |  |  |                                                                                                                                                   | individual functional profiles were assessed with regard to both abilities and disabilities to evaluate how to enhance the abilities and compensate for disabilities. Second, training activities were selected; the decision was shared between therapists and participants. |  |                                                                                                                                                                        |                                                                                                                                             |  |
| Tsuchiya et al., 2016 [35] | Brain-Activating rehabilitation |  |  | Enjoyable and comfortable activities to be performed in an atmosphere underpinned by values of acceptance.<br><br>Brain-activating rehabilitation |                                                                                                                                                                                                                                                                               |  | The patients should be praised to enhance their motivation.<br><br>The patients to be offered social roles that enhance their remaining abilities; and supportive care | The activities should be associated with empathetic 2-way communication between the staff and the patients as well as between the patients. |  |

|  |  |  |  |                                                                                                                                                                                                                                                                                                                                                                                                                                    |  |  |                                                                          |  |  |
|--|--|--|--|------------------------------------------------------------------------------------------------------------------------------------------------------------------------------------------------------------------------------------------------------------------------------------------------------------------------------------------------------------------------------------------------------------------------------------|--|--|--------------------------------------------------------------------------|--|--|
|  |  |  |  | <p>were also considered to enable participants to recover both a desire for life and their self-respect.</p> <p>Various activities were selected based on the patients' physical function, cognitive function, life history, and preferences.</p> <p>The patients should be offered social roles that enhance their remaining abilities; and supportive care should be provided to prevent task failure that causes confusion.</p> |  |  | <p>should be provided to prevent task failure that causes confusion.</p> |  |  |
|--|--|--|--|------------------------------------------------------------------------------------------------------------------------------------------------------------------------------------------------------------------------------------------------------------------------------------------------------------------------------------------------------------------------------------------------------------------------------------|--|--|--------------------------------------------------------------------------|--|--|

|                                       |                             |  |  |                                                                                                                                                                                                                                                                                                                          |                                                                                                                                                                                                                                                                                                                                                                                                                                                                                                                        |  |  |  |  |
|---------------------------------------|-----------------------------|--|--|--------------------------------------------------------------------------------------------------------------------------------------------------------------------------------------------------------------------------------------------------------------------------------------------------------------------------|------------------------------------------------------------------------------------------------------------------------------------------------------------------------------------------------------------------------------------------------------------------------------------------------------------------------------------------------------------------------------------------------------------------------------------------------------------------------------------------------------------------------|--|--|--|--|
| Van<br>Paasschen et<br>al., 2013 [34] | Cognitive<br>rehabilitation |  |  | All participants<br>initially learned<br>and practiced<br>all 3 strategies<br>(strategies for<br>acquiring new<br>information,<br>including verbal<br>and visual<br>mnemonics,<br>semantic<br>elaboration,<br>and expanding<br>rehearsal) and<br>then chose 1<br>preferred<br>strategy to<br>implement in<br>daily life. | The cognitive<br>rehabilitation<br>intervention<br>was tailored to<br>each<br>participant's<br>personal<br>difficulties in<br>daily life as<br>identified by<br>the Canadian<br>Occupational<br>Performance<br>Measure. One<br>or 2<br>rehabilitation<br>goals were<br>selected to<br>work on during<br>the<br>intervention.<br><br>Participants<br>identified up to<br>5 personally<br>relevant goals.<br><br>Participants<br>rated their<br>performance<br>and their<br>satisfaction on<br>each goal prior<br>to and |  |  |  |  |
|---------------------------------------|-----------------------------|--|--|--------------------------------------------------------------------------------------------------------------------------------------------------------------------------------------------------------------------------------------------------------------------------------------------------------------------------|------------------------------------------------------------------------------------------------------------------------------------------------------------------------------------------------------------------------------------------------------------------------------------------------------------------------------------------------------------------------------------------------------------------------------------------------------------------------------------------------------------------------|--|--|--|--|

|                              |                                                                            |  |  |  |                                          |  |  |  |  |
|------------------------------|----------------------------------------------------------------------------|--|--|--|------------------------------------------|--|--|--|--|
|                              |                                                                            |  |  |  | following the<br>intervention<br>period. |  |  |  |  |
| Werheid et<br>al., 2015 [58] | Cognitive<br>rehabilitation<br>and cognitive-<br>behavioral-<br>treatment. |  |  |  |                                          |  |  |  |  |

For Peer Review

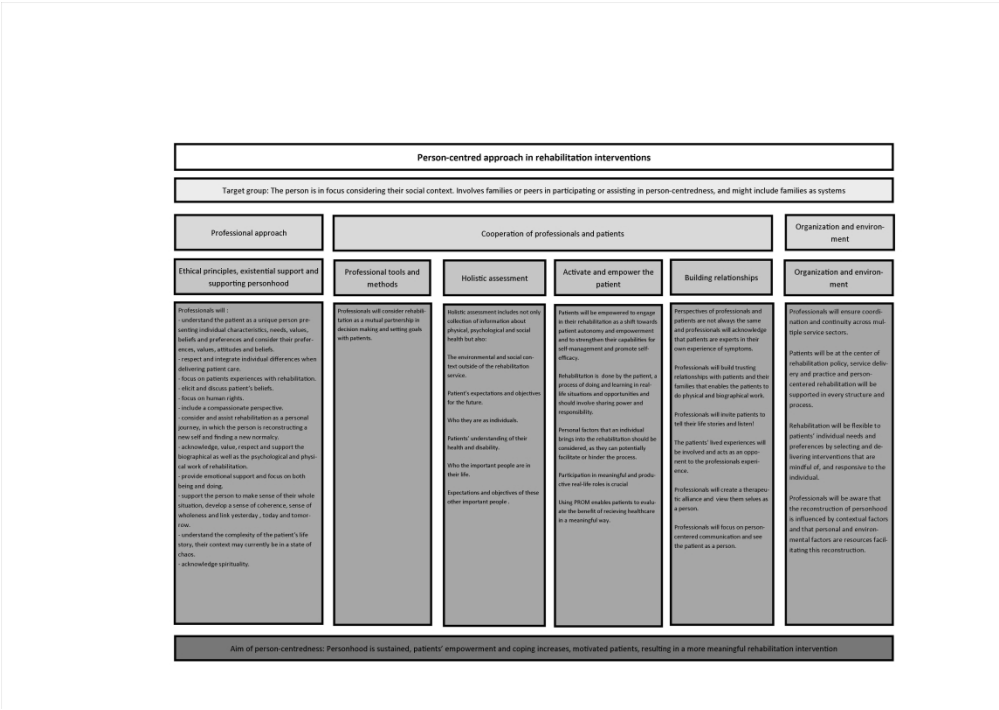

Figure 1, program theory

420x297mm (300 x 300 DPI)
